# Supplementary material for: Dual origins of the intracellular circadian calcium rhythm in the suprachiasmatic nucleus
Source: PubMed Central journal article supplement (PMC5290527; doi:10.1038/srep41733), 2017-02-03
Supplement: srep41733-s1.pdf [file srep41733-s1.pdf]

1 **Supplemental Information**

2

3 **Dual origins of the intracellular circadian calcium**  
4 **rhythm in the suprachiasmatic nucleus**

5

6 Ryosuke Enoki<sup>1,2,3,\*</sup>, Daisuke Ono<sup>1,5,\*</sup>, Shigeru Kuroda<sup>4</sup>, Sato Honma<sup>2</sup>, and  
7 Ken-ichi Honma<sup>2</sup>

8

9 ***Author affiliation:***

10 <sup>1</sup> Photonic Bioimaging Section, Research Center for Cooperative Projects; <sup>2</sup> Department of  
11 Chronomedicine, Hokkaido University Graduate School of Medicine, N15 W7, Kita-ku, Sapporo  
12 060-8638, Japan. <sup>3</sup> Precursory Research for Embryonic Science and Technology (PRESTO),  
13 Japan Science and Technology Agency (JST), Saitama 332-0012, Japan. <sup>4</sup> Mathematical and  
14 Physical Ethology Laboratory, Research Institute for Electrical Science, Hokkaido University,  
15 N20 W10, Kita-ku, Sapporo, Japan.

16 <sup>5</sup> Present address: Department of Neuroscience II, Research Institute of Environmental Medicine,  
17 Nagoya University, Nagoya 464-8601, Japan.

18 \*These authors contributed equally to this work.

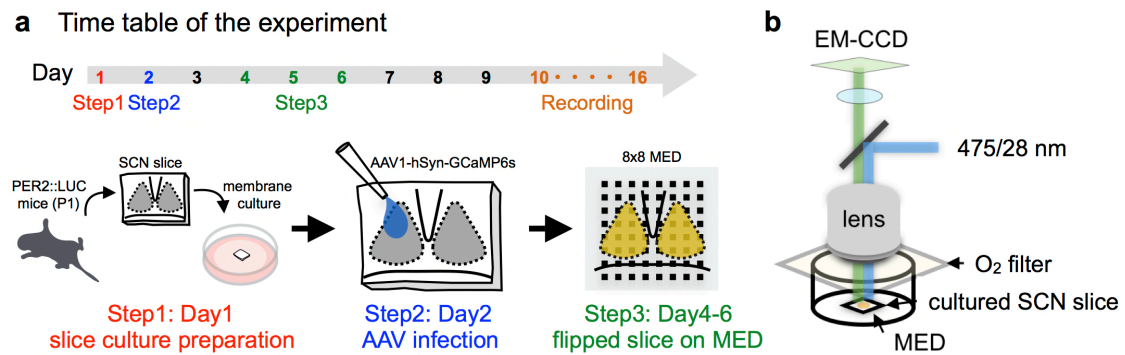

19  
20

21 **Fig. S1. Experimental procedure for simultaneous recording.**

22 (a) Step 1 (Day 1): The SCN slice was prepared from PER2::LUC knock-in  
 23 newborn mice of postnatal day 1, and was explanted on a culture membrane.  
 24 Step 2 (Day 2): Aliquots of the adeno-associated virus (AAV) (1  $\mu$ L) harboring  
 25 GCaMP6s under the control of the human synapsin-1 promoter (hSyn) were  
 26 inoculated onto the surface of the SCN cultures. Step 3 (Days 4–6): The  
 27 membrane with the cultured SCN slice was cut out, flipped over, and transferred  
 28 to a multielectrode array dish (MED) with 64 electrodes. Simultaneous recording  
 29 of three measures was started from the 10<sup>th</sup> culture day. (b) The fluorescence of  
 30 GCaMP6s and the bioluminescence of PER2 expression were measured by a  
 31 high-sensitivity EM-CCD camera mounted on an upright microscope.  
 32 Spontaneous firing was recorded by an MED system. The MED was sealed with  
 33 an O<sub>2</sub>-permeable filter. GCaMP6s was excited using 475/28 nm LED.

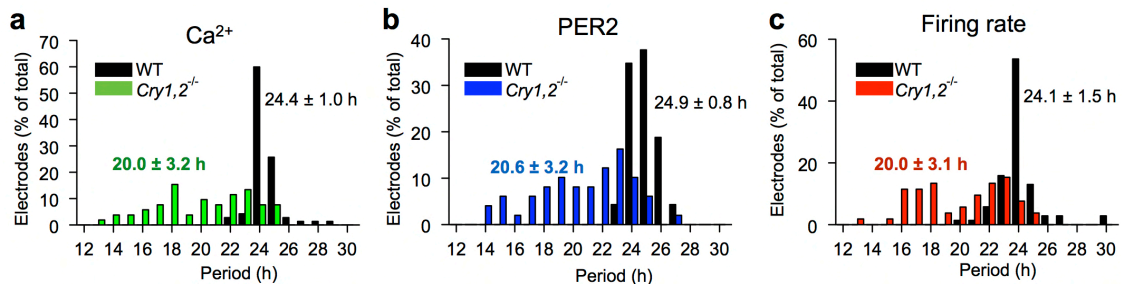

34

35

36 **Fig. S2. Statistical comparison of the circadian period of  $\text{Ca}^{2+}$ , PER2, and**  
 37 **spontaneous firing rhythms in the wild-type and  $\text{Cry1,2}^{-/-}$  SCN.**

38 The fluorescence/bioluminescence signals were obtained in ROIs on each MED  
 39 electrode and the distributions of the circadian period were analyzed in wild-type  
 40 and  $\text{Cry1,2}^{-/-}$  SCN for  $\text{Ca}^{2+}$  (a), PER2 (b), and spontaneous firing rhythms (c). All  
 41 data are given as means  $\pm$  sd. Wild-type (WT):  $n = 70$  in four slices,  $\text{Cry1,2}^{-/-}$ :  $n$   
 42  $= 52$  in four slices.
